# Supplementary material
Source: ML conference proceedings conference paper supplement (https://proceedings.neurips.cc/paper_files/paper/2022/hash/02917acec264a52a729b99d9bc857909-Abstract.html)
Supplement: Supplementary file 1 [file 02917acec264a52a729b99d9bc857909-Supplemental-Conference.zip]

Archive with 62 entries (58 files):
- multidistributionlearning/
- __MACOSX/._multidistributionlearning
- multidistributionlearning/.DS_Store
- __MACOSX/multidistributionlearning/._.DS_Store
- multidistributionlearning/.gitignore
- __MACOSX/multidistributionlearning/._.gitignore
- multidistributionlearning/hjz22_multidistribution_learning.pdf
- __MACOSX/multidistributionlearning/._hjz22_multidistribution_learning.pdf
- multidistributionlearning/codebase/
- __MACOSX/multidistributionlearning/._codebase
- multidistributionlearning/codebase/ready.sh
- __MACOSX/multidistributionlearning/codebase/._ready.sh
- multidistributionlearning/codebase/.DS_Store
- __MACOSX/multidistributionlearning/codebase/._.DS_Store
- multidistributionlearning/codebase/run.sh
- __MACOSX/multidistributionlearning/codebase/._run.sh
- multidistributionlearning/codebase/README.md
- __MACOSX/multidistributionlearning/codebase/._README.md
- multidistributionlearning/codebase/generate_paper_results.py
- __MACOSX/multidistributionlearning/codebase/._generate_paper_results.py
- multidistributionlearning/codebase/analysis_utils.py
- __MACOSX/multidistributionlearning/codebase/._analysis_utils.py
- multidistributionlearning/codebase/src/
- __MACOSX/multidistributionlearning/codebase/._src
- multidistributionlearning/codebase/src/models.py
- __MACOSX/multidistributionlearning/codebase/src/._models.py
- multidistributionlearning/codebase/src/loss.py
- __MACOSX/multidistributionlearning/codebase/src/._loss.py
- multidistributionlearning/codebase/src/utils.py
- __MACOSX/multidistributionlearning/codebase/src/._utils.py
- multidistributionlearning/codebase/src/train.py
- __MACOSX/multidistributionlearning/codebase/src/._train.py
- multidistributionlearning/codebase/src/analysis_utils.py
- __MACOSX/multidistributionlearning/codebase/src/._analysis_utils.py
- multidistributionlearning/codebase/src/utils_glue.py
- __MACOSX/multidistributionlearning/codebase/src/._utils_glue.py
- multidistributionlearning/codebase/src/data/
- __MACOSX/multidistributionlearning/codebase/src/._data
- multidistributionlearning/codebase/src/gen_cl_commands.py
- __MACOSX/multidistributionlearning/codebase/src/._gen_cl_commands.py
- multidistributionlearning/codebase/src/run_expt.py
- __MACOSX/multidistributionlearning/codebase/src/._run_expt.py
- multidistributionlearning/codebase/src/data/celebA_dataset.py
- __MACOSX/multidistributionlearning/codebase/src/data/._celebA_dataset.py
- multidistributionlearning/codebase/src/data/label_shift_utils.py
- __MACOSX/multidistributionlearning/codebase/src/data/._label_shift_utils.py
- multidistributionlearning/codebase/src/data/multinli_dataset.py
- __MACOSX/multidistributionlearning/codebase/src/data/._multinli_dataset.py
- multidistributionlearning/codebase/src/data/dro_dataset.py
- __MACOSX/multidistributionlearning/codebase/src/data/._dro_dataset.py
- multidistributionlearning/codebase/src/data/confounder_utils.py
- __MACOSX/multidistributionlearning/codebase/src/data/._confounder_utils.py
- multidistributionlearning/codebase/src/data/torchvision_datasets.py
- __MACOSX/multidistributionlearning/codebase/src/data/._torchvision_datasets.py
- multidistributionlearning/codebase/src/data/cub_dataset.py
- __MACOSX/multidistributionlearning/codebase/src/data/._cub_dataset.py
- multidistributionlearning/codebase/src/data/utils.py
- __MACOSX/multidistributionlearning/codebase/src/data/._utils.py
- multidistributionlearning/codebase/src/data/confounder_dataset.py
- __MACOSX/multidistributionlearning/codebase/src/data/._confounder_dataset.py
- multidistributionlearning/codebase/src/data/data.py
- __MACOSX/multidistributionlearning/codebase/src/data/._data.py
