# Supplementary material
Source: ML conference proceedings conference paper supplement (https://proceedings.neurips.cc/paper_files/paper/2022/hash/02917acec264a52a729b99d9bc857909-Abstract.html)
Supplement: Supplementary file 1 [file 02917acec264a52a729b99d9bc857909-Supplemental-Conference.zip › multidistributionlearning/codebase/ready.sh]

pip install torch torchvision pytorch-transformers

unzip waterbirds.zip
unzip multiNLI.zip
unzip celebA/img_align_celeba.zip -d celebA

bash run.sh
