# Supplementary material
Source: ML conference proceedings conference paper supplement (https://proceedings.neurips.cc/paper_files/paper/2022/hash/02917acec264a52a729b99d9bc857909-Abstract.html)
Supplement: Supplementary file 1 [file 02917acec264a52a729b99d9bc857909-Supplemental-Conference.zip › multidistributionlearning/codebase/src/data/confounder_dataset.py]

import os
import torch
import pandas as pd
from PIL import Image
import numpy as np
import torchvision.transforms as transforms
from models import model_attributes
from torch.utils.data import Dataset, Subset

class ConfounderDataset(Dataset):
    def __init__(self, root_dir,
                 target_name, confounder_names,
                 model_type=None, augment_data=None):
        raise NotImplementedError

    def __len__(self):
        return len(self.filename_array)

    def __getitem__(self, idx):
        y = self.y_array[idx]
        g = self.group_array[idx]

        if model_attributes[self.model_type]['feature_type']=='precomputed':
            x = self.features_mat[idx, :]
        else:
            img_filename = os.path.join(
                self.data_dir,
                self.filename_array[idx])
            img = Image.open(img_filename).convert('RGB')
            # Figure out split and transform accordingly
            if self.split_array[idx] == self.split_dict['train'] and self.train_transform:
                img = self.train_transform(img)
            elif (self.split_array[idx] in [self.split_dict['val'], self.split_dict['test']] and
              self.eval_transform):
                img = self.eval_transform(img)
            # Flatten if needed
            if model_attributes[self.model_type]['flatten']:
                assert img.dim()==3
                img = img.view(-1)
            x = img

        return x,y,g

    def get_splits(self, splits, train_frac=1.0):
        subsets = {}
        for split in splits:
            assert split in ('train','val','test'), split+' is not a valid split'
            mask = self.split_array == self.split_dict[split]
            num_split = np.sum(mask)
            indices = np.where(mask)[0]
            if train_frac<1 and split == 'train':
                num_to_retain = int(np.round(float(len(indices)) * train_frac))
                indices = np.sort(np.random.permutation(indices)[:num_to_retain])
            subsets[split] = Subset(self, indices)
            subsets[split].y_array = self.y_array[indices]
            subsets[split].group_array = self.group_array[indices]
        return subsets

    def group_str(self, group_idx):
        y = group_idx // (self.n_groups/self.n_classes)
        c = group_idx % (self.n_groups//self.n_classes)

        group_name = f'{self.target_name} = {int(y)}'
        bin_str = format(int(c), f'0{self.n_confounders}b')[::-1]
        for attr_idx, attr_name in enumerate(self.confounder_names):
            group_name += f', {attr_name} = {bin_str[attr_idx]}'
        return group_name
