# Supplementary material
Source: ML conference proceedings conference paper supplement (https://proceedings.neurips.cc/paper_files/paper/2022/hash/02917acec264a52a729b99d9bc857909-Abstract.html)
Supplement: Supplementary file 1 [file 02917acec264a52a729b99d9bc857909-Supplemental-Conference.zip › multidistributionlearning/codebase/src/data/confounder_utils.py]

import os
import torch
import pandas as pd
from PIL import Image
import numpy as np
import torchvision.transforms as transforms
from models import model_attributes
from torch.utils.data import Dataset, Subset
from data.celebA_dataset import CelebADataset
from data.cub_dataset import CUBDataset
from data.dro_dataset import DRODataset
from data.multinli_dataset import MultiNLIDataset

################
### SETTINGS ###
################

confounder_settings = {
    'CelebA':{
        'constructor': CelebADataset
    },
    'CUB':{
        'constructor': CUBDataset
    },
    'MultiNLI':{
        'constructor': MultiNLIDataset
    }
}

########################
### DATA PREPARATION ###
########################
def prepare_confounder_data(args, train, return_full_dataset=False):
    full_dataset = confounder_settings[args.dataset]['constructor'](
        root_dir=args.root_dir,
        target_name=args.target_name,
        confounder_names=args.confounder_names,
        model_type=args.model,
        augment_data=args.augment_data)
    if return_full_dataset:
        return DRODataset(
            full_dataset,
            process_item_fn=None,
            n_groups=full_dataset.n_groups,
            n_classes=full_dataset.n_classes,
            group_str_fn=full_dataset.group_str)
    if train:
        splits = ['train', 'val', 'test']
    else:
        splits = ['test']
    subsets = full_dataset.get_splits(splits, train_frac=args.fraction)
    dro_subsets = [DRODataset(subsets[split], process_item_fn=None, n_groups=full_dataset.n_groups,
                              n_classes=full_dataset.n_classes, group_str_fn=full_dataset.group_str) \
                   for split in splits]
    return dro_subsets
