# Supplementary material
Source: ML conference proceedings conference paper supplement (https://proceedings.neurips.cc/paper_files/paper/2022/hash/02917acec264a52a729b99d9bc857909-Abstract.html)
Supplement: Supplementary file 1 [file 02917acec264a52a729b99d9bc857909-Supplemental-Conference.zip › multidistributionlearning/codebase/src/data/cub_dataset.py]

import os
import torch
import pandas as pd
from PIL import Image
import numpy as np
import torchvision.transforms as transforms
from models import model_attributes
from torch.utils.data import Dataset, Subset
from data.confounder_dataset import ConfounderDataset

class CUBDataset(ConfounderDataset):
    """
    CUB dataset (already cropped and centered).
    Note: metadata_df is one-indexed.
    """

    def __init__(self, root_dir,
                 target_name, confounder_names,
                 augment_data=False,
                 model_type=None):
        self.root_dir = root_dir
        self.target_name = target_name
        self.confounder_names = confounder_names
        self.model_type = model_type
        self.augment_data = augment_data

        self.data_dir = self.root_dir

        if not os.path.exists(self.data_dir):
            raise ValueError(
                f'{self.data_dir} does not exist yet. Please generate the dataset first.')

        # Read in metadata
        self.metadata_df = pd.read_csv(
            os.path.join(self.data_dir, 'metadata.csv'))

        # Get the y values
        self.y_array = self.metadata_df['y'].values
        self.n_classes = 2

        # We only support one confounder for CUB for now
        self.confounder_array = self.metadata_df['place'].values
        self.n_confounders = 1
        # Map to groups
        self.n_groups = pow(2, 2)
        self.group_array = (self.y_array*(self.n_groups/2) + self.confounder_array).astype('int')

        # Extract filenames and splits
        self.filename_array = self.metadata_df['img_filename'].values
        self.split_array = self.metadata_df['split'].values
        self.split_dict = {
            'train': 0,
            'val': 1,
            'test': 2
        }

        # Set transform
        if model_attributes[self.model_type]['feature_type']=='precomputed':
            self.features_mat = torch.from_numpy(np.load(
                os.path.join(root_dir, 'features', model_attributes[self.model_type]['feature_filename']))).float()
            self.train_transform = None
            self.eval_transform = None
        else:
            self.features_mat = None
            self.train_transform = get_transform_cub(
                self.model_type,
                train=True,
                augment_data=augment_data)
            self.eval_transform = get_transform_cub(
                self.model_type,
                train=False,
                augment_data=augment_data)


def get_transform_cub(model_type, train, augment_data):
    scale = 256.0/224.0
    target_resolution = model_attributes[model_type]['target_resolution']
    assert target_resolution is not None

    if (not train) or (not augment_data):
        # Resizes the image to a slightly larger square then crops the center.
        transform = transforms.Compose([
            transforms.Resize((int(target_resolution[0]*scale), int(target_resolution[1]*scale))),
            transforms.CenterCrop(target_resolution),
            transforms.ToTensor(),
            transforms.Normalize([0.485, 0.456, 0.406], [0.229, 0.224, 0.225])
        ])
    else:
        transform = transforms.Compose([
            transforms.RandomResizedCrop(
                target_resolution,
                scale=(0.7, 1.0),
                ratio=(0.75, 1.3333333333333333),
                interpolation=2),
            transforms.RandomHorizontalFlip(),
            transforms.ToTensor(),
            transforms.Normalize([0.485, 0.456, 0.406], [0.229, 0.224, 0.225])
        ])
    return transform
