# Supplementary material
Source: ML conference proceedings conference paper supplement (https://proceedings.neurips.cc/paper_files/paper/2022/hash/02917acec264a52a729b99d9bc857909-Abstract.html)
Supplement: Supplementary file 1 [file 02917acec264a52a729b99d9bc857909-Supplemental-Conference.zip › multidistributionlearning/codebase/src/data/data.py]

import os
import torch
import numpy as np
from torch.utils.data import Subset
from data.label_shift_utils import prepare_label_shift_data
from data.confounder_utils import prepare_confounder_data

# root_dir = '/u/scr/nlp/dro/'
root_dir = '.'

dataset_attributes = {
    'CelebA': {
        'root_dir': 'celebA'
    },
    'CUB': {
        'root_dir': 'waterbirds'
    },
    'CIFAR10': {
        'root_dir': 'CIFAR10/data'
    },
    'MultiNLI': {
        'root_dir': 'multiNLI'
    }
}

for dataset in dataset_attributes:
    dataset_attributes[dataset]['root_dir'] = os.path.join(root_dir, dataset_attributes[dataset]['root_dir'])

shift_types = ['confounder', 'label_shift_step']

def prepare_data(args, train, return_full_dataset=False):
    # Set root_dir to defaults if necessary
    if args.root_dir is None:
        args.root_dir = dataset_attributes[args.dataset]['root_dir']
    if args.shift_type=='confounder':
        return prepare_confounder_data(args, train, return_full_dataset)
    elif args.shift_type.startswith('label_shift'):
        assert not return_full_dataset
        return prepare_label_shift_data(args, train)

def log_data(data, logger):
    logger.write('Training Data...\n')
    for group_idx in range(data['train_data'].n_groups):
        logger.write(f'    {data["train_data"].group_str(group_idx)}: n = {data["train_data"].group_counts()[group_idx]:.0f}\n')
    logger.write('Validation Data...\n')
    for group_idx in range(data['val_data'].n_groups):
        logger.write(f'    {data["val_data"].group_str(group_idx)}: n = {data["val_data"].group_counts()[group_idx]:.0f}\n')
    if data['test_data'] is not None:
        logger.write('Test Data...\n')
        for group_idx in range(data['test_data'].n_groups):
            logger.write(f'    {data["test_data"].group_str(group_idx)}: n = {data["test_data"].group_counts()[group_idx]:.0f}\n')
