# Supplementary material
Source: ML conference proceedings conference paper supplement (https://proceedings.neurips.cc/paper_files/paper/2022/hash/02917acec264a52a729b99d9bc857909-Abstract.html)
Supplement: Supplementary file 1 [file 02917acec264a52a729b99d9bc857909-Supplemental-Conference.zip › multidistributionlearning/codebase/src/models.py]

model_attributes = {
    'bert': {
        'feature_type': 'text'
    },
    'inception_v3': {
        'feature_type': 'image',
        'target_resolution': (299, 299),
        'flatten': False
    },
    'wideresnet50': {
        'feature_type': 'image',
        'target_resolution': (224, 224),
        'flatten': False
    },
    'resnet50': {
        'feature_type': 'image',
        'target_resolution': (224, 224),
        'flatten': False
    },
    'resnet34': {
        'feature_type': 'image',
        'target_resolution': None,
        'flatten': False
    },
    'raw_logistic_regression': {
        'feature_type': 'image',
        'target_resolution': None,
        'flatten': True,
    }
}
