# Supplementary material
Source: ML conference proceedings conference paper supplement (https://proceedings.neurips.cc/paper_files/paper/2022/hash/02917acec264a52a729b99d9bc857909-Abstract.html)
Supplement: Supplementary file 1 [file 02917acec264a52a729b99d9bc857909-Supplemental-Conference.zip › multidistributionlearning/codebase/src/train.py]

import os
import types
import math

import torch
import torch.nn as nn
import torch.nn.functional as F
from torch.utils.data import Dataset, DataLoader, Subset

import numpy as np
from tqdm import tqdm

from utils import AverageMeter, accuracy
from loss import LossComputer

from pytorch_transformers import AdamW, WarmupLinearSchedule

def run_epoch(epoch, model, optimizer, loader, loss_computer, logger, csv_logger, args,
              is_training, show_progress=False, log_every=50, scheduler=None):
    """
    scheduler is only used inside this function if model is bert.
    """

    if is_training:
        model.train()
        if args.model == 'bert':
            model.zero_grad()
    else:
        model.eval()

    if show_progress:
        prog_bar_loader = tqdm(loader)
    else:
        prog_bar_loader = loader

    with torch.set_grad_enabled(is_training):
        for batch_idx, batch in enumerate(prog_bar_loader):

            batch = tuple(t.cuda() for t in batch)
            x = batch[0]
            y = batch[1]
            g = batch[2]
            if args.model == 'bert':
                input_ids = x[:, :, 0]
                input_masks = x[:, :, 1]
                segment_ids = x[:, :, 2]
                outputs = model(
                    input_ids=input_ids,
                    attention_mask=input_masks,
                    token_type_ids=segment_ids,
                    labels=y
                )[1] # [1] returns logits
            else:
                outputs = model(x)

            loss_main = loss_computer.loss(outputs, y, g)

            if is_training:
                if args.model == 'bert':
                    loss_main.backward()
                    torch.nn.utils.clip_grad_norm_(model.parameters(), args.max_grad_norm)
                    scheduler.step()
                    optimizer.step()
                    model.zero_grad()
                else:
                    optimizer.zero_grad()
                    loss_main.backward()
                    optimizer.step()

            if is_training and (batch_idx+1) % log_every==0:
                csv_logger.log(epoch, batch_idx, loss_computer.get_stats(model, args))
                csv_logger.flush()
                loss_computer.log_stats(logger, is_training)
                loss_computer.reset_stats()

        if (not is_training) or loss_computer.batch_count > 0:
            csv_logger.log(epoch, batch_idx, loss_computer.get_stats(model, args))
            csv_logger.flush()
            loss_computer.log_stats(logger, is_training)
            if is_training:
                loss_computer.reset_stats()


def train(model, criterion, dataset,
          logger, train_csv_logger, val_csv_logger, test_csv_logger,
          args, epoch_offset):
    model = model.cuda()

    # process generalization adjustment stuff
    adjustments = [float(c) for c in args.generalization_adjustment.split(',')]
    assert len(adjustments) in (1, dataset['train_data'].n_groups)
    if len(adjustments)==1:
        adjustments = np.array(adjustments* dataset['train_data'].n_groups)
    else:
        adjustments = np.array(adjustments)

    train_loss_computer = LossComputer(
        criterion,
        is_robust=args.robust,
        dataset=dataset['train_data'],
        alpha=args.alpha,
        gamma=args.gamma,
        adj=adjustments,
        step_size=args.robust_step_size,
        normalize_loss=args.use_normalized_loss,
        btl=args.btl,
        min_var_weight=args.minimum_variational_weight)

    # BERT uses its own scheduler and optimizer
    if args.model == 'bert':
        no_decay = ['bias', 'LayerNorm.weight']
        optimizer_grouped_parameters = [
            {'params': [p for n, p in model.named_parameters() if not any(nd in n for nd in no_decay)], 'weight_decay': args.weight_decay},
            {'params': [p for n, p in model.named_parameters() if any(nd in n for nd in no_decay)], 'weight_decay': 0.0}
            ]
        optimizer = AdamW(
            optimizer_grouped_parameters,
            lr=args.lr,
            eps=args.adam_epsilon)
        t_total = len(dataset['train_loader']) * args.n_epochs
        print(f'\nt_total is {t_total}\n')
        scheduler = WarmupLinearSchedule(
            optimizer,
            warmup_steps=args.warmup_steps,
            t_total=t_total)
    else:
        optimizer = torch.optim.SGD(
            filter(lambda p: p.requires_grad, model.parameters()),
            lr=args.lr,
            momentum=0.9,
            weight_decay=args.weight_decay)
        if args.scheduler:
            scheduler = torch.optim.lr_scheduler.ReduceLROnPlateau(
                optimizer,
                'min',
                factor=0.1,
                patience=5,
                threshold=0.0001,
                min_lr=0,
                eps=1e-08)
        else:
            scheduler = None

    best_val_acc = 0
    previous_adv_probs = None
    for epoch in range(epoch_offset, epoch_offset+args.n_epochs):
        logger.write('\nEpoch [%d]:\n' % epoch)

        if args.train_epoch_size:
            num_subepochs = math.ceil(len(dataset["train_data"]) / args.train_epoch_size)
        else:
            num_subepochs = 1
        for subepoch in range(num_subepochs):
            logger.write('Sub-Epoch {}/{}\n'.format(subepoch + 1, num_subepochs))
            logger.write(f'Training:\n')
            run_epoch(
                epoch, model, optimizer,
                dataset['train_loader'],
                train_loss_computer,
                logger, train_csv_logger, args,
                is_training=True,
                show_progress=args.show_progress,
                log_every=args.log_every,
                scheduler=scheduler)

            if args.resample:
                logger.write(f'\nValidation:\n')
                val_loss_computer = LossComputer(
                    criterion,
                    is_robust=args.robust,
                    dataset=dataset['val_data'],
                    step_size=args.robust_step_size,
                    alpha=args.alpha)
                if previous_adv_probs is not None:
                    val_loss_computer.adv_probs = previous_adv_probs
                run_epoch(
                    epoch, model, optimizer,
                    dataset['val_loader_small'],
                    val_loss_computer,
                    logger, val_csv_logger, args,
                    is_training=False)

                adv_probs = val_loss_computer.manual_update(val_loss_computer.avg_group_loss)
                previous_adv_probs = adv_probs

                if args.partitioner:
                    dataset["train_loader"].sampler.weights = dataset["train_data"].get_partitioner(adv_probs.cpu()).cuda()
                else:
                    group_weights = len(dataset["train_data"]) / dataset["train_data"]._group_counts
                    group_weights = group_weights.cuda() * adv_probs
                    dataset["train_loader"].sampler.weights = group_weights[dataset["train_data"]._group_array]


        # Test set; don't print to avoid peeking
        if dataset['test_data'] is not None:
            test_loss_computer = LossComputer(
                criterion,
                is_robust=args.robust,
                dataset=dataset['test_data'],
                step_size=args.robust_step_size,
                alpha=args.alpha)
            run_epoch(
                epoch, model, optimizer,
                dataset['test_loader'],
                test_loss_computer,
                None, test_csv_logger, args,
                is_training=False)

        # Inspect learning rates
        if (epoch+1) % 1 == 0:
            for param_group in optimizer.param_groups:
                curr_lr = param_group['lr']
                logger.write('Current lr: %f\n' % curr_lr)

        if args.scheduler and args.model != 'bert':
            if args.robust:
                val_loss, _ = val_loss_computer.compute_robust_loss_greedy(val_loss_computer.avg_group_loss, val_loss_computer.avg_group_loss)
            else:
                val_loss = val_loss_computer.avg_actual_loss
            scheduler.step(val_loss) #scheduler step to update lr at the end of epoch

        if epoch % args.save_step == 0:
            torch.save(model, os.path.join(args.log_dir, '%d_model.pth' % epoch))

        if args.save_last:
            torch.save(model, os.path.join(args.log_dir, 'last_model.pth'))

        if args.save_best:
            if args.robust or args.reweight_groups:
                curr_val_acc = min(val_loss_computer.avg_group_acc)
            else:
                curr_val_acc = val_loss_computer.avg_acc
            logger.write(f'Current validation accuracy: {curr_val_acc}\n')
            if curr_val_acc > best_val_acc:
                best_val_acc = curr_val_acc
                torch.save(model, os.path.join(args.log_dir, 'best_model.pth'))
                logger.write(f'Best model saved at epoch {epoch}\n')

        if args.automatic_adjustment:
            gen_gap = val_loss_computer.avg_group_loss - train_loss_computer.exp_avg_loss
            adjustments = gen_gap * torch.sqrt(train_loss_computer.group_counts)
            train_loss_computer.adj = adjustments
            logger.write('Adjustments updated\n')
            for group_idx in range(train_loss_computer.n_groups):
                logger.write(
                    f'  {train_loss_computer.get_group_name(group_idx)}:\t'
                    f'adj = {train_loss_computer.adj[group_idx]:.3f}\n')
        logger.write('\n')
